# Supplementary material for: Fate of per- and polyfluoroalkyl substances (PFAS) during hydrothermal liquefaction of municipal wastewater treatment sludge
Source: Royal Society of Chemistry journal article supplement (doi:10.1039/c9ew01139k), 2020-01-01
Supplement: c9ew01139k1.pdf [file c9ew01139k1.pdf]

*Supporting Information for*

**Fate of Per- and Polyfluoroalkyl Substances (PFAS) during Hydrothermal  
Liquefaction of Municipal Wastewater Treatment Sludge**

Jie Yu <sup>a</sup>, Anastasia Nickerson <sup>b</sup>, Yalin Li <sup>b,†</sup>, Yida Fang <sup>b</sup>, Timothy J. Strathmann <sup>b\*</sup>

<sup>a</sup> School of Civil and Environmental Engineering, Ningbo University, Ningbo 315211, China

<sup>b</sup> Department of Civil and Environmental Engineering, Colorado School of Mines, Golden,  
Colorado 80401, United States

<sup>†</sup> Present address: Institute for Sustainability, Energy, and Environment, University of Illinois  
at Urbana-Champaign, Urbana, IL 61801, United States

\*Corresponding author. E-mail: strthmnn@mines.edu (T.J. Strathmann); Tel: +1 (303) 384-  
2226

## List of tables

**Table s1** Apparent recoveries of isotope-labeled PFAS standards in different matrices, linearity range and determination coefficients ( $R^2$ ) of calibration curves for the target PFAS measurement during the HTL reactions of sludge.

**Table s2** Apparent recoveries of isotope-labeled PFAS standards for the target PFAS measurement during the 60-min aqueous-only reactions.

**Table s3** F and p values from one-way analysis of variance (ANOVA) and multiple comparisons of product yields with HTL temperature as a variable (data from Fig. 1a).

**Table s4** F and p values from one-way ANOVA and multiple comparisons of carbon mass distribution in products with HTL temperature as a variable (data from Fig. 1b).

**Table s5** F and p values from one-way ANOVA and multiple comparisons of extent of PFAS degradation during aqueous-only HTL reactions with temperature as a variable (data from Fig. 2a).

**Table s6** F and p values from one-way ANOVA and multiple comparisons of extent of PFAS degradation during wet sludge HTL reactions with temperature as a variable (data from Fig. 2b).

**Table s7** F and p values from one-way ANOVA and multiple comparisons of extent of defluorination during aqueous-only HTL reactions with temperature as a variable (data from Fig. 2c).

**Table s8** F and p values from one-way ANOVA and multiple comparisons of extent of PFAS degradation during wet sludge HTL reactions with reaction time as a variable (data from Fig. 3).

**Table s9** P values from one-way ANOVA of extent of PFAS degradation between the aqueous-only and wet sludge HTL reactions (data from Fig. 2a and 2b).

**Table s1** Apparent recoveries of isotope-labeled PFAS standards in different matrices, linearity range and determination coefficients ( $R^2$ ) of calibration curves for the target PFAS measurement during the HTL reactions of sludge.

| PFAS      | HTL conditions   |            | Recovery (%) |              |          | Linearity range (ng/mL) | $R^2$ |
|-----------|------------------|------------|--------------|--------------|----------|-------------------------|-------|
|           | Temperature (°C) | Time (min) | Aqueous      | Biocrude oil | Solid    |                         |       |
| PFOA      | control          |            | 105 ± 59     |              | 96 ± 53  | 0.015-77                | 0.992 |
|           | 260              | 60         | 110 ± 7      | 88 ± 6       | 89 ± 1   |                         |       |
|           | 300              | 60         | 134 ± 12     | 55 ± 3       | 103 ± 1  |                         |       |
|           | 350              | 60         | 84 ± 5       | 57 ± 19      | 103 ± 20 |                         |       |
|           | 350              | 30         | 73 ± 1       | 137 ± 25     | 88 ± 5   |                         |       |
|           | 350              | 90         | 88 ± 5       | 34 ± 2       | 85 ± 2   |                         |       |
| PFOS      | control          |            | 114 ± 65     |              | 80 ± 44  | 0.008-77                | 0.999 |
|           | 260              | 60         | 93 ± 3       | 56 ± 4       | 60 ± 1   |                         |       |
|           | 300              | 60         | 111 ± 15     | 16 ± 2       | 77 ± 6   |                         |       |
|           | 350              | 60         | 82 ± 12      | 20 ± 4       | 82 ± 21  |                         |       |
|           | 350              | 30         | 81 ± 1       | 51 ± 10      | 88 ± 6   |                         |       |
|           | 350              | 90         | 84 ± 4       | 15 ± 1       | 77 ± 2   |                         |       |
| 8:2 FTUCA | control          |            | 134 ± 44     |              | 77 ± 39  | 0.015-77                | 0.999 |
|           | 260              | 60         | 268 ± 12     | 147 ± 17     | 69 ± 3   |                         |       |
|           | 300              | 60         | 380 ± 40     | 98 ± 1       | 90 ± 9   |                         |       |
|           | 350              | 60         | 115 ± 1      | 93 ± 49      | 73 ± 12  |                         |       |
|           | 350              | 30         | 106 ± 1      | 131 ± 32     | 77 ± 4   |                         |       |
|           | 350              | 90         | 122 ± 6      | 43 ± 1       | 70 ± 1   |                         |       |
| 7:3 FTCA  | control          |            | 41 ± 1       |              | 45 ± 6   | 0.077-77                | 0.996 |
|           | 260              | 60         | 96 ± 3       | 23 ± 2       | 13 ± 1   |                         |       |
|           | 300              | 60         | 127 ± 18     | 11 ± 1       | 19 ± 1   |                         |       |
|           | 350              | 60         | 87 ± 19      | 12 ± 1       | 26 ± 7   |                         |       |
|           | 350              | 30         | 42 ± 1       | 29 ± 2       | 40 ± 5   |                         |       |
|           | 350              | 90         | 71 ± 1       | 10 ± 1       | 32 ± 1   |                         |       |
| 8:2 FTS   | control          |            | 138 ± 46     |              | 138 ± 43 | 0.015-15                | 0.993 |
|           | 260              | 60         | 92 ± 5       | 89 ± 12      | 111 ± 6  |                         |       |
|           | 300              | 60         | 98 ± 13      | 46 ± 7       | 91 ± 5   |                         |       |
|           | 350              | 60         | 102 ± 1      | 54 ± 15      | 93 ± 30  |                         |       |
|           | 350              | 30         | 75 ± 1       | 195 ± 1      | 93 ± 12  |                         |       |
|           | 350              | 90         | 109 ± 2      | 34 ± 1       | 75 ± 5   |                         |       |

Control refers to the re-hydrated sludge maintained at ambient temperature during the reaction period.

**Table s2** Apparent recoveries of isotope-labeled PFAS standards for the target PFAS measurement during the 60-min aqueous-only reactions.

| HTL temperatures<br>(°C) | Recovery (%) |        |           |          |         |
|--------------------------|--------------|--------|-----------|----------|---------|
|                          | PFOA         | PFOS   | 8:2 FTUCA | 7:3 FTCA | 8:2 FTS |
| 260                      | 64 ± 2       | 35 ± 1 | 79 ± 3    | 83 ± 3   | 127 ± 1 |
| 300                      | 51 ± 2       | 29 ± 1 | 89 ± 2    | 93 ± 4   | 116 ± 2 |
| 350                      | 73 ± 1       | 39 ± 1 | 104 ± 1   | 108 ± 1  | 59 ± 1  |

**Table s3** F and p values from one-way analysis of variance (ANOVA) and multiple comparisons of product yields with HTL temperature as a variable (data from Fig. 1a).

| Yield        | One-way ANOVA  |                | p <sup>b</sup> (multiple comparisons) |        |       |
|--------------|----------------|----------------|---------------------------------------|--------|-------|
|              | F <sup>a</sup> | p <sup>b</sup> | 260°C                                 | 300°C  | 350°C |
| solid        | 148            | 0.000*         | 260°C                                 | -      | -     |
|              |                |                | 300°C                                 | 0.000* | -     |
|              |                |                | 350°C                                 | 0.000* | 0.850 |
| biocrude oil | 58             | 0.000*         | 260°C                                 | -      | -     |
|              |                |                | 300°C                                 | 0.000* | -     |
|              |                |                | 350°C                                 | 0.000* | 0.509 |
| gas          | 12             | 0.004*         | 260°C                                 | -      | -     |
|              |                |                | 300°C                                 | 0.058  | -     |
|              |                |                | 350°C                                 | 0.001* | 0.056 |

<sup>a</sup> F value refers to ratio of mean square between groups to within groups.

<sup>b</sup> p value refers to the significance of difference. \* indicates statistical difference (p<0.05).

**Table s4** F and p values from one-way ANOVA and multiple comparisons of carbon mass distribution in products with HTL temperature as a variable (data from Fig. 1b).

| Carbon mass<br>distribution | One-way ANOVA |        | p (multiple comparisons) |        |        |
|-----------------------------|---------------|--------|--------------------------|--------|--------|
|                             | F             | p      | 260°C                    | 300°C  | 350°C  |
| aqueous                     | 218           | 0.001* | 260°C                    | -      | -      |
|                             |               |        | 300°C                    | 0.001* | -      |
|                             |               |        | 350°C                    | 0.000* | 0.004* |
| solid                       | 47            | 0.005* | 260°C                    | -      | -      |
|                             |               |        | 300°C                    | 0.004* | -      |
|                             |               |        | 350°C                    | 0.004* | 0.957  |
| biocrude oil                | 142           | 0.001* | 260°C                    | -      | -      |
|                             |               |        | 300°C                    | 0.001* | -      |
|                             |               |        | 350°C                    | 0.001* | 0.314  |
| gas                         | 2             | 0.265  | 260°C                    | -      | -      |
|                             |               |        | 300°C                    | 0.212  | -      |
|                             |               |        | 350°C                    | 0.147  | 0.739  |

\* indicates statistical difference (p<0.05).

**Table s5** F and p values from one-way ANOVA and multiple comparisons of extent of PFAS degradation during aqueous-only HTL reactions with temperature as a variable (data from Fig. 2a).

| Extent of degradation | One-way ANOVA |        | p (multiple comparisons) |        |       |
|-----------------------|---------------|--------|--------------------------|--------|-------|
|                       | F             | p      | 260°C                    | 300°C  | 350°C |
| PFOA                  | 0.8           | 0.535  | 260°C                    | -      |       |
|                       |               |        | 300°C                    | 0.324  | -     |
|                       |               |        | 350°C                    | 0.828  | 0.416 |
| 8:2 FTUCA             | 1             | 0.315  | 260°C                    | -      |       |
|                       |               |        | 300°C                    | 0.186  | -     |
|                       |               |        | 350°C                    | 0.229  | 1.000 |
| 7:3 FTCA              | 54            | 0.004* | 260°C                    | -      |       |
|                       |               |        | 300°C                    | 0.003* | -     |
|                       |               |        | 350°C                    | 0.003* | 0.652 |
| 8:2 FTS               | 0.2           | 0.839  | 260°C                    | -      |       |
|                       |               |        | 300°C                    | 0.832  | -     |
|                       |               |        | 350°C                    | 0.705  | 0.574 |

Data for PFOS not shown because no degradation of PFOS was observed in the aqueous-only reactions.

\* indicates statistical difference ( $p < 0.05$ ).

**Table s6** F and p values from one-way ANOVA and multiple comparisons of extent of PFAS degradation during wet sludge HTL reactions with temperature as a variable (data from Fig. 2b).

| Extent of degradation | One-way ANOVA |        | p (multiple comparisons) |        |        |
|-----------------------|---------------|--------|--------------------------|--------|--------|
|                       | F             | p      | 260°C                    | 300°C  | 350°C  |
| PFOA                  | 1             | 0.379  | 260°C                    | -      |        |
|                       |               |        | 300°C                    | 0.213  | -      |
|                       |               |        | 350°C                    | 0.312  | 0.741  |
| PFOS                  | 0.2           | 0.854  | 260°C                    |        |        |
|                       |               |        | 300°C                    | 0.884  |        |
|                       |               |        | 350°C                    | 0.715  | 0.615  |
| 7:3 FTCA              | 581           | 0.000* | 260°C                    | -      |        |
|                       |               |        | 300°C                    | -      | -      |
|                       |               |        | 350°C                    | 0.000* | 0.000* |
| 8:2 FTS               | 71            | 0.003* | 260°C                    | -      |        |
|                       |               |        | 300°C                    | 0.005* | -      |
|                       |               |        | 350°C                    | 0.001* | 0.025* |

Data for 8:2 FTUCA not shown because it is fully degraded following wet sludge HTL reactions.

\* indicates statistical difference ( $p < 0.05$ ).

**Table s7** F and p values from one-way ANOVA and multiple comparisons of extent of defluorination during aqueous-only HTL reactions with temperature as a variable (data from Fig. 2c).

| Extent of defluorination | One-way ANOVA |        | p (multiple comparisons) |        |        |
|--------------------------|---------------|--------|--------------------------|--------|--------|
|                          | F             | p      | 260°C                    | 300°C  | 350°C  |
| PFOA                     | 7             | 0.029* | 260°C                    | -      |        |
|                          |               |        | 300°C                    | 0.089  | -      |
|                          |               |        | 350°C                    | 0.254  | 0.010* |
| 8:2 FTUCA                | 23            | 0.015* | 260°C                    | -      |        |
|                          |               |        | 300°C                    | 0.017* | -      |
|                          |               |        | 350°C                    | 0.007* | 0.176  |
| 7:3 FTCA                 | 25            | 0.014* | 260°C                    | -      |        |
|                          |               |        | 300°C                    | 0.038* | -      |
|                          |               |        | 350°C                    | 0.006* | 0.039* |
| 8:2 FTS                  | 9             | 0.054  | 260°C                    | -      |        |
|                          |               |        | 300°C                    | 0.462  | -      |
|                          |               |        | 350°C                    | 0.028* | 0.050* |

Data for PFOS not shown because no defluorination of PFOS was observed in the aqueous-only reactions.

\* indicates statistical difference ( $p < 0.05$ ).

**Table s8** F and p values from one-way ANOVA and multiple comparisons of extent of PFAS degradation during wet sludge HTL reactions with reaction time as a variable (data from Fig. 3).

| Extent of degradation | One-way ANOVA |       | p (multiple comparisons) |        |        |
|-----------------------|---------------|-------|--------------------------|--------|--------|
|                       | F             | p     | 30 min                   | 60 min | 90 min |
| PFOA                  | 9             | 0.055 | 30 min                   | -      |        |
|                       |               |       | 60 min                   | 0.033* | -      |
|                       |               |       | 90 min                   | 0.038* | 0.862  |
| PFOS                  | 2             | 0.319 | 30 min                   | -      |        |
|                       |               |       | 60 min                   | 0.171  | -      |
|                       |               |       | 90 min                   | 0.286  | 0.653  |
| 7:3 FTCA              | 8             | 0.066 | 30 min                   | -      |        |
|                       |               |       | 60 min                   | 0.048* | -      |
|                       |               |       | 90 min                   | 0.038* | 0.766  |
| 8:2 FTS               | 6             | 0.091 | 30 min                   | -      |        |
|                       |               |       | 60 min                   | 0.285  | -      |
|                       |               |       | 90 min                   | 0.042* | 0.126  |

Data for 8:2 FTUCA not shown because it is fully degraded following wet sludge HTL reactions.

\* indicates statistical difference ( $p < 0.05$ ).

**Table s9** P values from one-way ANOVA of extent of PFAS degradation between the aqueous-only and wet sludge HTL reactions (data from Fig. 2a and 2b).

| Extent of degradation | p (one-way ANOVA) |        |        |
|-----------------------|-------------------|--------|--------|
|                       | 260°C             | 300°C  | 350°C  |
| PFOA                  | 0.054             | 0.385  | 0.291  |
| PFOS                  | 0.038*            | 0.060  | 0.119  |
| 8:2 FTUCA             | 0.366             | -      | 0.423  |
| 7:3 FTCA              | 0.134             | 0.000* | 0.256  |
| 8:2 FTS               | 0.636             | 0.037* | 0.017* |

\* indicates statistical difference ( $p < 0.05$ ).
